# Supplementary material
Source: HighWire-hosted journal article supplement (https://openheart.bmj.com/content/4/1/e000417)
Supplement: inline-supplementary-material-1 [file inline-supplementary-material-1.pdf]

**Supplement: Daily nutrient targets for Dietary Approach to Stop**

**Hypertension (DASH) scores**

| <b>Nutrient</b>           | <b>Intermediate DASH target</b> | <b>DASH target</b>  |
|---------------------------|---------------------------------|---------------------|
| <b>Protein</b>            | > 16.5% of energy               | > 18% of energy     |
| <b>Saturated fat</b>      | < 11% of energy                 | < 6% of energy      |
| <b>Total fat</b>          | < 32% of energy                 | < 27% of energy     |
| <b>Cholesterol</b>        | < 107.1 mg/1000 kcal            | < 71.4 mg/1000 kcal |
| <b>Fiber</b>              | > 9.5 g/1000 kcal               | > 14.8 g/1000 kcal  |
| <b>Magnesium</b>          | > 158 mg/1000 kcal              | > 238 mg/1000 kcal  |
| <b>Calcium</b>            | > 402 mg/1000 kcal              | > 590 mg/1000 kcal  |
| <b>Potassium</b>          | > 1534 mg/1000 kcal             | > 2238 mg/1000 kcal |
| <b>Sodium</b>             | < 1286 mg/1000 kcal             | < 1143 mg/1000 kcal |
| Adapted from reference 19 |                                 |                     |
